# Supplementary material for: Usage and health perception of cannabidiol-containing products among the population in Germany: a descriptive study conducted in 2020 and 2021
Source: Springer Nature journal article supplement (doi:10.1186/s12889-023-17142-0), 2023-11-23
Supplement: MOESM1 [file 26349494]

## Supplement A: Questionnaires

Note: In both study parts, a questionnaire in German language was used. The English translation of the questions is provided below.

### Q1: Questionnaire study part I

#### Question – Awareness

Now we would like to ask you a question about cannabidiol. Cannabidiol is also known as CBD.

Have you already heard of products containing CBD?

*1 Yes, I have already heard of it*

*2 No, I have not heard of it*

*99 don't know*

#### Question – CBD use

Have you already consumed or used products containing CBD?

*1 Yes, I have already consumed or used it.*

*2 No, I have not consumed or used it yet*

*99 don't know*

### Q2: Questionnaire study part II

#### Question – Awareness

Have you heard of the following products?

*(Items are randomised)*

- (1) Products containing CBD (cannabidiol)
- (2) Products containing THC (tetrahydrocannabidiol)
- (3) Products containing BPS (bisphenol A)
- (4) Products containing aluminium salts
- (5) Products containing Arkonital

*1 Yes, I have heard of it*

*2 No, I have not heard of it*

*99 don't know / no information*

#### Question – CBD use

Have you already consumed or used products containing CBD (cannabidiol)?

*1 Yes, I have already consumed/used it.*

*2 No, I have not consumed/used yet*

*3 I am not sure*

*99 No answer*

**Question – Age**

How old are you?

*Open question*

**Question – Gender**

Your gender - you are:

*1 male*

*2 female*

*3 diverse*

**Question – School-leaving qualification**

What is your highest educational qualification?

If you are still in school, please indicate which degree you are aiming for.

*1 Without school leaving certificate*

*2 Low secondary education*

*3 Mediate secondary education*

*4 High secondary education*

*5 Tertiary education*

**Question – Product groups**

To which product groups can you assign the products that you have already consumed or used?

Note: Please select all that apply.

*(Items are randomised, except 98 and 99)*

*1 CBD oil or tinctures (taken orally)*

*2 CBD crystals*

*3 CBD capsules or pills*

*4 CBD chewing gum or dragées*

*5 CBD patches*

*6 CBD flowers*

*7 CBD-containing foods (e.g. chocolate, cereal bars)*

*8 Cosmetics or care products containing CBD*

*9 CBD-containing liquids for e-cigarettes or vaporisers*

*10 Beverages containing CBD*

*11 CBD-containing medicines/drugs*

*98 Other, namely \_\_\_\_\_*

*99 don't know / no information*

**Question – Reason for use**

For what reasons have you consumed or used products containing CBD (cannabidiol)?

Note: Please write the answer in the text box.

---

*99 no answer*

### **Question – Frequency of use**

How often do you currently consume or use products containing CBD (cannabidiol)?

- 1 *daily*
- 2 *several times a week*
- 3 *about once a week*
- 4 *about once or three times a month*
- 5 *less than once a month*
- 6 *not at all*
  
- 99 *don't know / no answer*

### **Question – Intention of use**

Can you imagine consuming or using products containing CBD (cannabidiol) in the future?

- 1 *Yes*
- 2 *No*
  
- 99 *don't know / no answer*

### **Question – Acquisition**

Where do you generally purchase products containing CBD (cannabidiol)?

Note: Multiple answers allowed.

*(Items are randomised, except 7, 97 and 99)*

- 1 *Online shop*
- 2 *Drugstore*
- 3 *Pharmacy*
- 4 *Supermarket/discounter*
- 5 *Organic market/reform store*
- 6 *Specialised shop for CDB or hemp products*
- 7 *Other shop*
  
- 97 *Other way of purchase, namely: \_\_\_\_\_*
- 99 *don't know / no answer*

### **Question – Assessment of risk-benefit**

How do you assess the health risk and health benefit of products containing CBD (cannabidiol)?

*(Items are randomised)*

- (1) Health risk
- (2) Health benefit

- 1 *1 - very low*
- 2 *2 - low*
- 3 *3 - neither*
- 4 *4 - high*
- 5 *5 - very high*
  
- 99 *don't know / no answer*

### **Question – Health risk mentioned**

Which health risks do you see in products containing CBD (cannabidiol)?

Note: Please write the answer in the text box.

---

*99 no answer*

### **Question – Health benefits mentioned**

Which health benefits do you see in products containing CBD (cannabidiol)?

Note: Please write the answer in the text box.

---

*99 no answer*

### **Question – Knowledge**

In your opinion, does each of the following statements apply or not?

*(Items are randomised)*

- (1) Products containing CBD (cannabidiol) have been tested for health safety.
- (2) The substance CBD (cannabidiol) can be physically addictive.
- (3) The substance CBD (cannabidiol) can have an intoxicating effect ("high").
- (4) Products containing CBD (cannabidiol) can influence the effect of medication.
- (5) Products containing CBD (cannabidiol) may also contain THC.

*1 Does not apply*

*2 Does apply*

*99 don't know / no answer*

## SUPPLEMENTAL B: Tables

**Table S1.** Interpretation of used effect sizes

|                                    | Small effect | Medium effect | Large effect |
|------------------------------------|--------------|---------------|--------------|
| Cohen's <i>d</i>                   | 0.20         | 0.50          | 0.80         |
| Cramer's <i>V</i> ( <i>df</i> = 1) | 0.10         | 0.30          | 0.50         |
| Cramer's <i>V</i> ( <i>df</i> = 2) | 0.07         | 0.21          | 0.35         |

*Note.* Rules of thumb for interpretation of effect sizes based on Cohen (1988).<sup>1</sup>

**Table S2.** Demographic characteristics of respondents in study part I

|                                      | Total    |      | Gender   |      |          |      | Highest educational level        |      |                                              |      |                                 |      | Age (in years) |      |          |      |              |      |
|--------------------------------------|----------|------|----------|------|----------|------|----------------------------------|------|----------------------------------------------|------|---------------------------------|------|----------------|------|----------|------|--------------|------|
|                                      |          |      | Female   |      | Male     |      | Student / Lower secondary school |      | Secondary school without high school diploma |      | High school / University degree |      | 14 to 29       |      | 30 to 59 |      | 60 and older |      |
|                                      | <i>n</i> | %    | <i>n</i> | %    | <i>n</i> | %    | <i>n</i>                         | %    | <i>n</i>                                     | %    | <i>n</i>                        | %    | <i>n</i>       | %    | <i>n</i> | %    | <i>n</i>     | %    |
| Base                                 | 1,011    | 100  | 510      | 50.5 | 501      | 49.5 | 378                              | 37.4 | 306                                          | 30.2 | 327                             | 32.4 | 198            | 19.6 | 483      | 47.8 | 330          | 32.6 |
| Have heard of CBD <sup>a</sup>       | 406      | 40.2 | 203      | 50.1 | 203      | 49.9 | 109                              | 26.8 | 132                                          | 32.5 | 165                             | 40.7 | 123            | 30.2 | 206      | 50.7 | 78           | 19.1 |
| Have used/ consumed CBD <sup>b</sup> | 116      | 11.4 | 51       | 43.8 | 65       | 56.2 | 31                               | 26.6 | 31                                           | 26.5 | 54                              | 46.9 | 34             | 29.6 | 65       | 56.5 | 16           | 13.9 |

<sup>a</sup> Reflects the number and percentage of participants answering “yes” to the question (1) “Have you already heard of any products that contain CBD?”

<sup>b</sup> Reflects the number and percentage of all participants answering “yes” to the question (1) and subsequently to question (2) “Have you already consumed or used any products that contain CBD?”

**Table S3.** Demographic characteristics of respondents in study part II

|                                         | Total    |       | Gender   |      |          |      |          |     | Highest educational level                   |      |                                              |      |                                 |      | Age (in years) |      |          |      |              |      |
|-----------------------------------------|----------|-------|----------|------|----------|------|----------|-----|---------------------------------------------|------|----------------------------------------------|------|---------------------------------|------|----------------|------|----------|------|--------------|------|
|                                         |          |       | Female   |      | Male     |      | Divers   |     | Without graduation / Lower secondary school |      | Secondary school without high school diploma |      | High school / university degree |      | 16 to 29       |      | 30 to 59 |      | 60 and older |      |
|                                         | <i>n</i> | %     | <i>n</i> | %    | <i>n</i> | %    | <i>n</i> | %   | <i>n</i>                                    | %    | <i>n</i>                                     | %    | <i>n</i>                        | %    | <i>n</i>       | %    | <i>n</i> | %    | <i>n</i>     | %    |
| Base                                    | 2,000    | 100.0 | 1,057    | 52.9 | 941      | 47.1 | 2        | 0.1 | 421                                         | 21.2 | 712                                          | 35.6 | 867                             | 43.4 | 562            | 28.1 | 1,027    | 51.4 | 411          | 20.5 |
| Have used/consumed CBD <sup>a</sup>     | 535      | 26.8  | 277      | 51.8 | 256      | 47.9 | 2        | 0.4 | 113                                         | 21.1 | 182                                          | 34.0 | 240                             | 44.9 | 196            | 36.6 | 254      | 47.5 | 85           | 15.9 |
| Have not used/consumed CBD <sup>b</sup> | 1,271    | 63.6  | 695      | 54.7 | 576      | 45.3 | 0        | 0.0 | 260                                         | 20.5 | 463                                          | 36.4 | 548                             | 43.1 | 298            | 23.4 | 690      | 54.3 | 283          | 22.3 |
| Not sure <sup>c</sup>                   | 186      | 9.3   | 84       | 45.2 | 102      | 54.8 | 0        | 0.0 | 45                                          | 24.2 | 63                                           | 33.9 | 78                              | 41.9 | 64             | 34.4 | 80       | 43.0 | 42           | 22.6 |
| No response <sup>d</sup>                | 8        | 0.4   | 1        | 12.5 | 7        | 87.5 | 0        | 0.0 | 3                                           | 37.5 | 4                                            | 50.0 | 1                               | 12.5 | 4              | 50.0 | 3        | 37.5 | 1            | 12.5 |

<sup>a</sup> Reflects the number and percentage of all participants answering “yes” to the question “Have you already consumed or used any products that contain CBD?”

<sup>b</sup> Reflects the number and percentage of all participants answering “no” to the question “Have you already consumed or used any products that contain CBD?”

<sup>c</sup> Reflects the number and percentage of all participants answering “I am not sure” to the question “Have you already consumed or used any products that contain CBD?”

<sup>d</sup> Reflects the number and percentage of all participants answering “no response” to the question “Have you already consumed or used any products that contain CBD?”

**Table S4.** Intention of future use (study part II)

| Can you imagine consuming or using products that contain CBD (cannabidiol) in the future? | <i>n</i>    | %            |
|-------------------------------------------------------------------------------------------|-------------|--------------|
| Yes                                                                                       | 614         | 48.3         |
| No                                                                                        | 324         | 25.5         |
| Don't know / no response                                                                  | 333         | 26.2         |
| <b>Total</b>                                                                              | <b>1271</b> | <b>100.0</b> |

Base: Respondents who have not consumed/used CBD (*n* = 1,271).

**Table S5.** Source of purchase (study part II)

| Where do you generally purchase products containing CBD (cannabidiol)? (multiple response) | <i>n</i>   | %          |
|--------------------------------------------------------------------------------------------|------------|------------|
| Online shop                                                                                | 296        | 55.3       |
| Pharmacy                                                                                   | 113        | 21.1       |
| Specialized shops for CBD- and hemp-products                                               | 107        | 20.0       |
| Drug store                                                                                 | 105        | 19.6       |
| Supermarket / discount store                                                               | 62         | 11.6       |
| Organic market / health food store                                                         | 54         | 10.1       |
| Other shop                                                                                 | 31         | 5.8        |
| Others                                                                                     | 21         | 3.9        |
| Don't know / no response                                                                   | 25         | 4.7        |
| <b>Total</b>                                                                               | <b>535</b> | <b>100</b> |

Base: Respondents who have already consumed/used CBD ( $n = 535$ ).



**Table S6.** Frequency of use by age and education (study part II)

| How often do you currently consume or use products containing CBD (cannabidiol)? | Total      |              | Age (in years) |              |            |              |              |              | Highest educational level                     |              |                                              |              |                               |              |
|----------------------------------------------------------------------------------|------------|--------------|----------------|--------------|------------|--------------|--------------|--------------|-----------------------------------------------|--------------|----------------------------------------------|--------------|-------------------------------|--------------|
|                                                                                  |            |              | 16 to 29       |              | 30 to 59   |              | 60 and older |              | Without graduation/<br>Lower secondary school |              | Secondary school without high school diploma |              | High school/university degree |              |
|                                                                                  | <i>n</i>   | %            | <i>n</i>       | %            | <i>n</i>   | %            | <i>n</i>     | %            | <i>n</i>                                      | %            | <i>n</i>                                     | %            | <i>n</i>                      | %            |
| daily                                                                            | 94         | 17.6         | 14             | 7.1          | 55         | 21.7         | 25           | 29.4         | 33                                            | 29.2         | 34                                           | 18.7         | 27                            | 11.3         |
| several times a week                                                             | 88         | 16.4         | 24             | 12.2         | 43         | 16.9         | 21           | 24.7         | 29                                            | 25.7         | 26                                           | 14.3         | 33                            | 13.8         |
| about once a week                                                                | 43         | 8.0          | 20             | 10.2         | 17         | 6.7          | 6            | 7.1          | 4                                             | 3.5          | 17                                           | 9.3          | 22                            | 9.2          |
| about once or three times a month                                                | 75         | 14.0         | 32             | 16.3         | 35         | 13.8         | 8            | 9.4          | 7                                             | 6.2          | 27                                           | 14.8         | 41                            | 17.1         |
| less than once a month                                                           | 125        | 23.4         | 65             | 33.2         | 51         | 20.1         | 9            | 10.6         | 20                                            | 17.7         | 38                                           | 20.9         | 67                            | 27.9         |
| not at all                                                                       | 106        | 19.8         | 37             | 18.9         | 53         | 20.9         | 16           | 18.8         | 20                                            | 17.7         | 39                                           | 21.4         | 47                            | 19.6         |
| don't know / no response                                                         | 4          | 0.7          | 4              | 2.0          | 0          | 0.0          | 0            | 0.0          | 0                                             | 0.0          | 1                                            | 0.5          | 3                             | 1.3          |
| <b>Total</b>                                                                     | <b>535</b> | <b>100.0</b> | <b>196</b>     | <b>100.0</b> | <b>254</b> | <b>100.0</b> | <b>85</b>    | <b>100.0</b> | <b>113</b>                                    | <b>100.0</b> | <b>182</b>                                   | <b>100.0</b> | <b>240</b>                    | <b>100.0</b> |

Base: Respondents who have already consumed/used CBD ( $n = 535$ ).

**Table S7.** Perceived health risks and health benefits by usage of CBD-containing products (study part II)

|                          | Health risks |              |            |              |              |              | Health benefits |              |            |              |              |              |
|--------------------------|--------------|--------------|------------|--------------|--------------|--------------|-----------------|--------------|------------|--------------|--------------|--------------|
|                          | Total        |              | Users      |              | Non-users    |              | Total           |              | Users      |              | Non-users    |              |
|                          | <i>n</i>     | %            | <i>n</i>   | %            | <i>n</i>     | %            | <i>n</i>        | %            | <i>n</i>   | %            | <i>n</i>     | %            |
| Very low                 | 467          | 23.4         | 223        | 41.7         | 204          | 16.1         | 66              | 3.3          | 26         | 4.9          | 37           | 2.9          |
| Low                      | 626          | 31.3         | 168        | 31.4         | 397          | 31.2         | 180             | 9.0          | 39         | 7.3          | 126          | 9.9          |
| Neither                  | 423          | 21.2         | 102        | 19.1         | 280          | 22.0         | 391             | 19.6         | 100        | 18.7         | 250          | 19.7         |
| High                     | 151          | 7.6          | 13         | 2.4          | 120          | 9.4          | 754             | 37.7         | 205        | 38.3         | 479          | 37.7         |
| Very high                | 65           | 3.3          | 11         | 2.1          | 49           | 3.9          | 352             | 17.6         | 156        | 29.2         | 161          | 12.7         |
| Don't know / no response | 268          | 13.4         | 18         | 3.4          | 221          | 17.4         | 257             | 12.9         | 9          | 1.7          | 218          | 17.2         |
| <b>Total</b>             | <b>2,000</b> | <b>100.0</b> | <b>535</b> | <b>100.0</b> | <b>1,271</b> | <b>100.0</b> | <b>2,000</b>    | <b>100.0</b> | <b>535</b> | <b>100.0</b> | <b>1,271</b> | <b>100.0</b> |

## References

1. Cohen, J. (1988). *Statistical Power Analysis for the Behavioral Sciences* (2nd ed.). New York: Routledge Academic. <https://doi.org/10.4324/9780203771587>
